# Supplementary material
Source: Springer Nature journal article supplement (https://www.springermedizin.de/resource/supplementary/13013_2012_548_MOESM1_ESM.pdf/9631884)

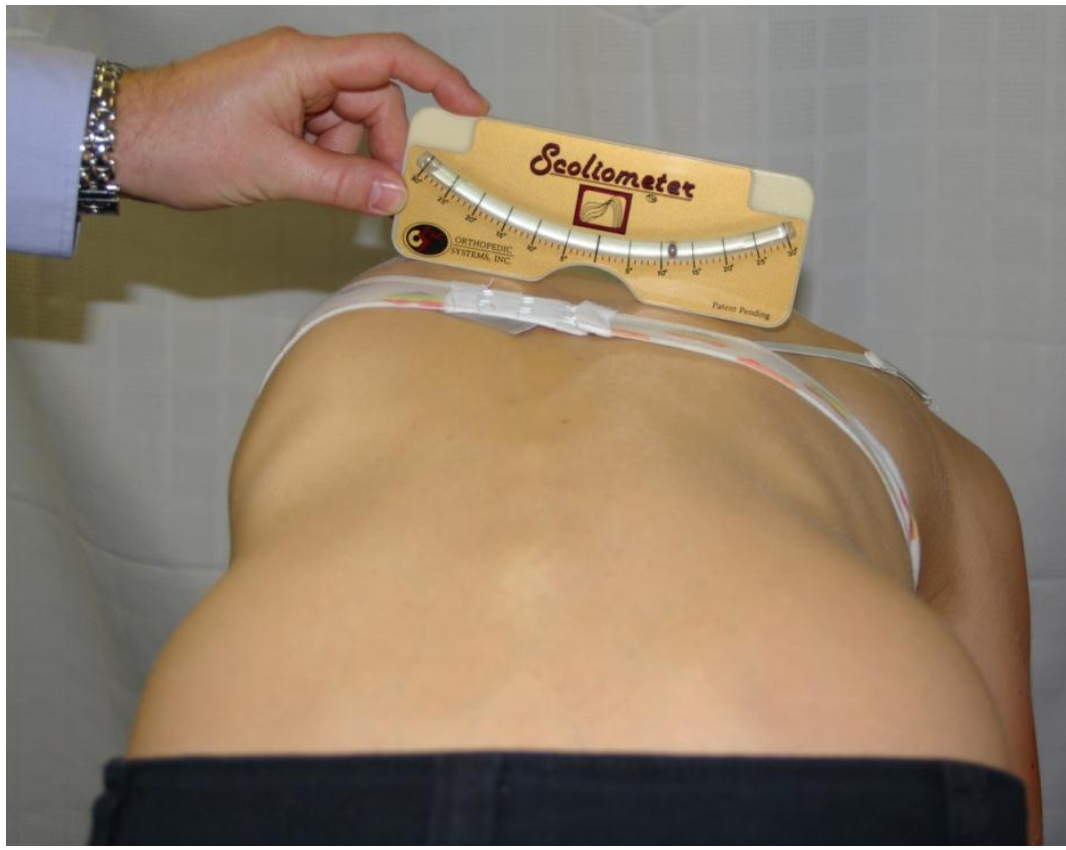

Scolometer

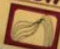

ORTHOPEDIC  
SYSTEMS, INC.

Patent Pending

Supplement: MOESM1 [file 9631884]
